# Supplementary material for: Divergence of the quadrupole-strain susceptibility of the electronic nematic system YbRu2Ge2
Source: PubMed Central journal article supplement — Proc Natl Acad Sci U S A. 2019 Mar 21;116(15):7232–7. doi: 10.1073/pnas.1818910116 (PMC6462099; doi:10.1073/pnas.1818910116), 2019-03-21
Supplement: pnas.1818910116.sapp.pdf [file pnas.1818910116.sapp.pdf]

1

## 2 **Supplementary Information for**

### 3 **Divergence of the quadrupole-strain susceptibility of $\text{YbRu}_2\text{Ge}_2$ ; a local moment realization of** 4 **electronic nematicity**

5 **Elliott W. Rosenberg, Jiun-Haw Chu, Jacob P.C Ruff, Alexander T. Hristov, and Ian R. Fisher**

6 **Elliott Rosenberg.**

7 **E-mail: [erosenbe@stanford.edu](mailto:erosenbe@stanford.edu)**

#### 8 **This PDF file includes:**

9 Figs. S1 to S7

10 References for SI reference citations

## 11 Supporting Information (SI)

### 12 1. CEF splitting of the J=7/2 Hund's rule multiplet of YbRu<sub>2</sub>Ge<sub>2</sub>

13 The Hund's rule groundstate multiplet of the Yb<sup>3+</sup> ion, which is characterized by a total angular momentum number J=7/2, is  
14 split by the crystal electric field (CEF) according to the effective Hamiltonian:

$$15 H_{CEF} = B_2^0 O_2^0 + B_4^0 O_4^0 + B_4^2 O_4^2 + B_6^0 O_6^0 + B_6^4 O_6^4 \quad [1]$$

16 Where  $O_l^m$  are the conventional Steven's operators (1) and  $B_l^m$  are coefficients to be determined. The resulting energy  
17 spectrum comprises 4 Kramers doublets (two doublets with  $\Gamma_6$  symmetry, and two doublets with  $\Gamma_7$  symmetry) and has been  
18 characterized by a combination of inelastic neutron scattering (2) and thermodynamic probes (3). The tentative spectrum of  
19 states proposed by Jeevan in (4) is  $\Gamma_6$  at 91meV,  $\Gamma_7$  at 32 meV,  $\Gamma_7$  at 0.9 meV, and  $\Gamma_6$  at 0 meV (ground state), illustrated in  
20 Fig. S1. This is the spectrum that we use to calculate the low-temperature quadrupole strain susceptibility, as described in the  
21 main text and below in Section S3. Although this is just a proposed spectrum, changing the balance of states that comprise  
22 the CEF  $\Gamma_6$  groundstate and  $\Gamma_7$  first excited state will affect the quadrupole moment, and will cause the 4f charge density  
23 to acquire a more pronounced 4-fold rotational symmetry, but does not change the functional form of the quadrupole strain  
24 susceptibility shown in equations 2 and 3 in the main text.

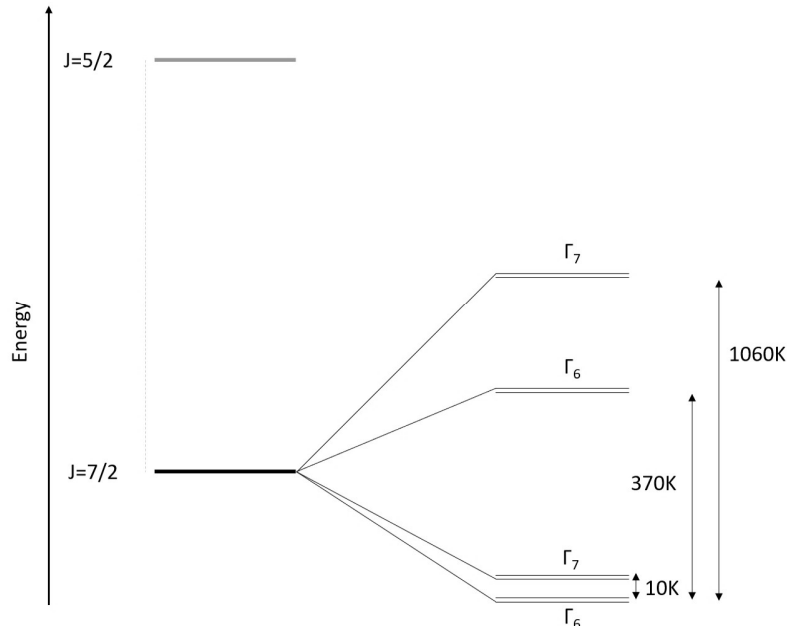

Fig. S1. YbRu<sub>2</sub>Ge<sub>2</sub> CEF spectrum Spin-orbit coupling determines the ground state electronic multiplet to have J=7/2, which is split by the surrounding crystalline potential to have 4 doublets, the lowest two in energy forming a quasi-quartet split by roughly 10K.

### 25 2. X-ray diffraction data for YbRu<sub>2</sub>Ge<sub>2</sub>

26 Low temperature, high-resolution, X-ray diffraction measurements were performed on beamline A2 at CHESS (Cornell High  
27 Energy Synchrotron Source). Splitting of the (6 0 0) Bragg peak was observed below 10.2K, with the new peaks indicative  
28 of an orthorhombic structural distortion with a  $B_{1g}$  ( $x^2-y^2$ ) symmetry, the associated domain structure of which results in  
29 4 separate peaks along the (1 1 0) and (1 -1 0) directions (5). Representative data are shown in Figures S2 and S3, taken  
30 at 12.2 K (above  $T_Q$ ) and 6.6 K (below  $T_Q$ ) respectively. A line cut along the (1 1 0) direction for both data sets is shown  
31 in Figure S4. The data in Figure S3 and S4 for  $T < T_Q$  reveal the persistence of the central tetragonal peak, albeit with  
32 a reduced intensity, implying that some part of the illuminated volume of the crystal remains in the tetragonal state upon  
33 cooling through  $T_Q$ . Since the phase transition is characterized via heat capacity measurements to be continuous (3), this  
34 observation implies heterogeneity of either the sample temperature or of the critical temperature  $T_Q$ . Thermodynamic and  
35 transport measurements indicate a maximum spread of critical temperatures of approximately 0.5 K but at least in principle  
36 local strains due to sample mounting for the measurement can plausibly affect the critical temperature leading to a larger  
37 variation. Additional measurements would be necessary to characterize how rapidly  $T_Q$  is affected by homogeneous strains of  
38 various symmetries in order to assess whether this is the origin of the effect. To best account for this when determining the  
39 orthorhombic order parameter (shown in Figure 3 of the main paper), we obtained the position of the first moment of counts  
40 along the (1 1 0) direction (above a background threshold), that were clearly not part of the original tetragonal peak.

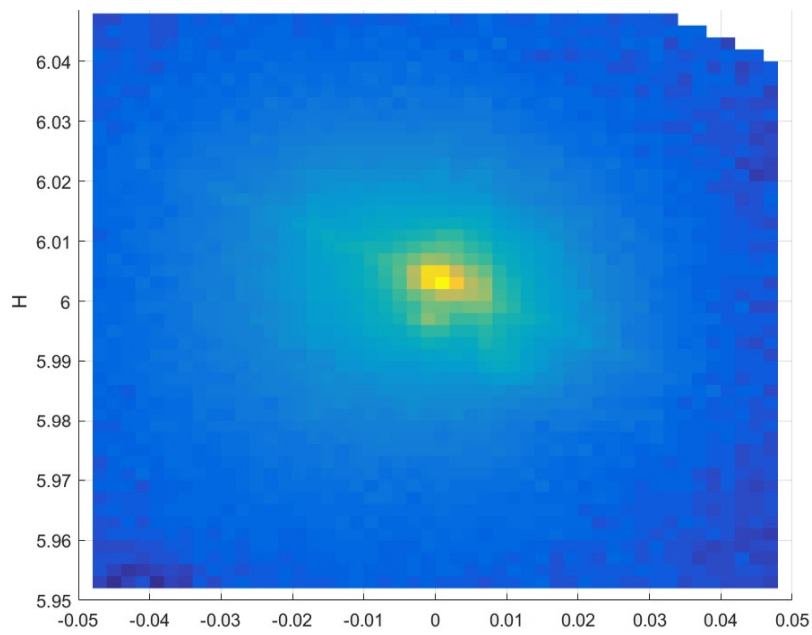

**Fig. S2. Surface plot of  $\log(\text{intensity})$  at 12.2K** The material is still clearly tetragonal here, although it is displaying some spread in the momentum space direction that orthorhombic domains are expected, possibly indicating critical fluctuations or a static response to unintentional strains from securing the crystal to the sample holder.

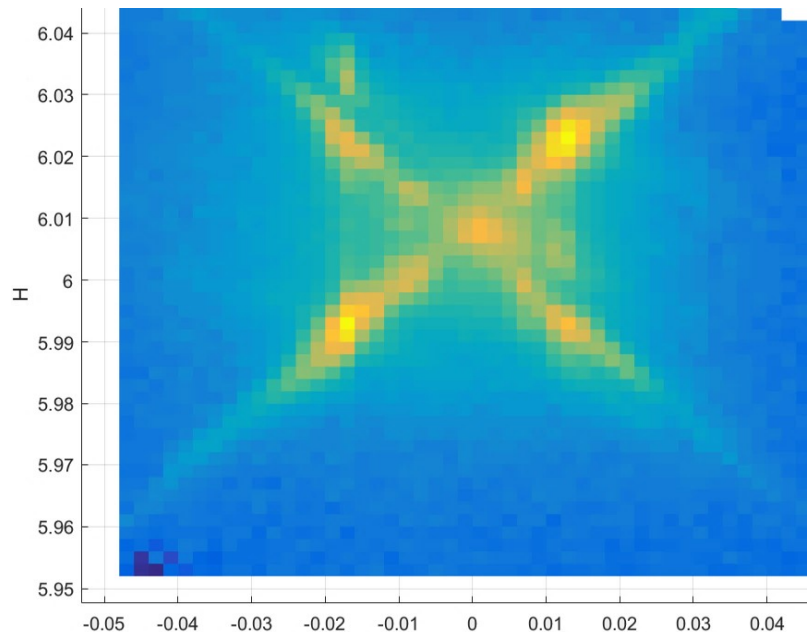

**Fig. S3. Surface plot of  $\log(\text{intensity})$  at 6.6K** The material is clearly orthorhombic at this temperature, displaying multiple peaks.

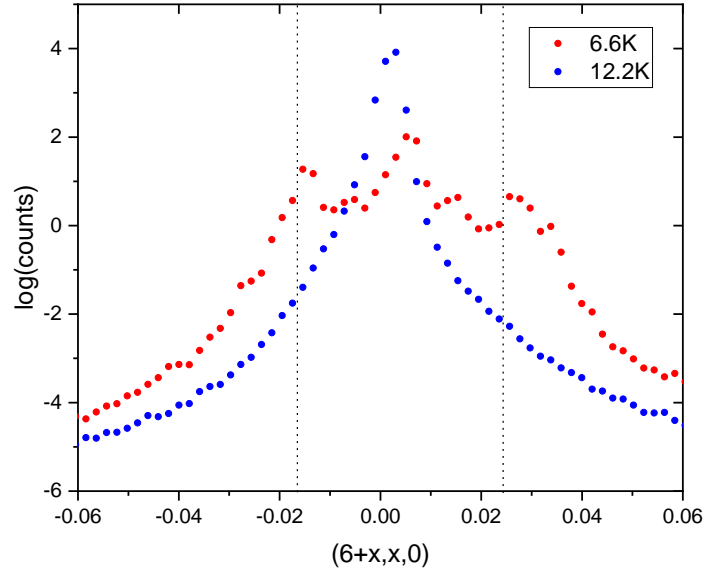

1

**Fig. S4. Line cut of log(counts) along the (1,1,0) direction, centered at (6,0,0)** The dotted lines represent where the first moment of counts was determined to be, which was normalized by the lattice parameters to determine the orthorhombic order parameter.

### 3. Quadrupole operators

The three relevant quadrupole operators, which correspond to the axis of the quadrupole oriented along  $[0\ 0\ 1]$  ( $z^2$  symmetry), along  $[1\ 0\ 0]$  or  $[0\ 1\ 0]$  ( $x^2 - y^2$  symmetry), and along  $[1\ 1\ 0]$  or  $[1\ -1\ 0]$  (xy symmetry) respectively, are given by the familiar Steven's operators:

$$O_2^0 = 3J_z^2 - J(J+1) \quad [2]$$

$$O_2^2 = J_x^2 - J_y^2 = \frac{1}{2}(J_+^2 + J_-^2) \quad [3]$$

$$P_{xy} = \frac{1}{2}(J_x J_y + J_y J_x) = \frac{-i}{4}(J_+^2 - J_-^2) \quad [4]$$

In the restricted Hilbert space corresponding to the quasi-quartet CEF groundstate of  $\text{YbRu}_2\text{Ge}_2$ , these operators have the following matrix elements, where for convenience the basis of states is represented in the order  $(3/2, -1/2, -3/2, 1/2)$

$$O_2^0 = \begin{bmatrix} -15 & 0 & 0 & 0 \\ 0 & -9 & 0 & 0 \\ 0 & 0 & -15 & 0 \\ 0 & 0 & 0 & -9 \end{bmatrix}$$

$$O_2^2 = \begin{bmatrix} 0 & 2\sqrt{15} & 0 & 0 \\ 2\sqrt{15} & 0 & 0 & 0 \\ 0 & 0 & 0 & 2\sqrt{15} \\ 0 & 0 & 2\sqrt{15} & 0 \end{bmatrix}$$

$$P_{xy} = \begin{bmatrix} 0 & -i\sqrt{15} & 0 & 0 \\ i\sqrt{15} & 0 & 0 & 0 \\ 0 & 0 & 0 & i\sqrt{15} \\ 0 & 0 & -i\sqrt{15} & 0 \end{bmatrix}$$

Noticing the correspondence to the Pauli spin matrices, we introduce for completeness a third, octupole, operator, that will also have finite matrix elements in this basis:  $O_3^{-2} = \frac{-i}{4}(J_z(J_+^2 - J_-^2) + (J_+^2 - J_-^2)J_z)$

$$O_3^{-2} = \begin{bmatrix} 0 & -i\sqrt{15} & 0 & 0 \\ i\sqrt{15} & 0 & 0 & 0 \\ 0 & 0 & 0 & -i\sqrt{15} \\ 0 & 0 & i\sqrt{15} & 0 \end{bmatrix}$$

54 Inspection of these expressions reveals they can be written as tensor products of the canonical Pauli matrices and the  
55 identity, I:

$$56 \quad O_0^2 = I \otimes (-3\sigma_z - 12I) \quad [5]$$

$$57 \quad O_2^2 = I \otimes (2\sqrt{15}\sigma_x) \quad [6]$$

$$58 \quad P_{xy} = \sigma_z \otimes (\sqrt{15}\sigma_y) \quad [7]$$

$$59 \quad O_3^{-2} = I \otimes (\sqrt{15}\sigma_y) \quad [8]$$

60 With reference to the tensor product formula:

$$61 \quad [I \otimes A, I \otimes B] = I \otimes [A, B] \quad [9]$$

62 and noting that constants don't affect commutation relations, the three operators  $O_2^0$ ,  $O_2^2$ , and  $O_3^{-2}$  obey the canonical  
63 commutation relations. The quasi-quartet ground state can be thought of as two replicas of a pseudo-spin  $\frac{1}{2}$  doublet, where the  
64 two replicas arise as a consequence of Kramer's theorem. These three operators will then serve as the effective spin operators  
65 in the three spatial dimensions of the pseudo-spin space. The quartet is split (by roughly  $\Delta_0 = 10K$ ) due to the tetragonal  
66 point symmetry of the CEF, yielding a finite  $\sigma_z$  (i.e a finite  $O_2^0$  quadrupole moment) above  $T_Q$ . Mixing of these eigenstates, as  
67 described in Figure 1 of the main text, can then yield finite quadrupole moments  $O_2^2$  or  $P_{xy}$ .

#### 68 4. Quadrupole-strain Susceptibility

Externally applied stresses cause finite strains, which in turn affect the eigenstates and eigenvalues of  $H_{CEF}$ , shifting and  
admixing the states described in Section S1. The magneto-elastic coupling (MEC) Hamiltonian is given by

$$H = H_{CEF} + \sum_{\Gamma_i} B_m^l \varepsilon_{\Gamma_i} Q_{\Gamma_i}$$

69 Where  $B_m^l$  are coefficients yet to be determined, and  $\Gamma_i$  are irreducible representations of the point group. Applying a  
70 non-zero stress which induces a strain ( $\varepsilon_\gamma = \varepsilon_{xx} - \varepsilon_{yy}$ ) will induce a finite moment of  $\langle O_2^2 \rangle$ , which will perturbatively change  
71 the existing Hamiltonian (in the basis of the quasi-quartet) to be in the form:

$$H = H_{CEF} + B_2^2 \varepsilon_\gamma O_2^2 = I \otimes \begin{bmatrix} \Delta_0/2 & 2\sqrt{15}B_2^2 \varepsilon_\gamma \\ 2\sqrt{15}B_2^2 \varepsilon_\gamma & -\Delta_0/2 \end{bmatrix}$$

72 Diagonalizing this matrix gives a new energy gap of:

$$73 \quad \Delta/2 = \sqrt{(\Delta_0/2)^2 + 60(B_2^2 \varepsilon_\gamma)^2} \quad [10]$$

74 The thermal expectation value of the quadrupolar moment  $\langle O_2^2 \rangle$  is now:

$$75 \quad \langle O_2^2 \rangle = \frac{120B_2^2 \varepsilon_\gamma}{\Delta} \tanh\left(\frac{\Delta}{2T}\right) \quad [11]$$

76 Thus the quadrupole-strain susceptibility is:

$$77 \quad \chi_{Q_{B_{1g}}} = \left. \frac{dQ_{B_{1g}}}{d\varepsilon_{B_{1g}}} \right|_{\varepsilon \rightarrow 0} = \frac{60B_2^2}{T} \quad [12]$$

78 when  $T \gg \Delta_0$ , and

$$79 \quad \chi_{Q_{B_{1g}}} = \left. \frac{dQ_{B_{1g}}}{d\varepsilon_{B_{1g}}} \right|_{\varepsilon \rightarrow 0} = \frac{120B_2^2}{\Delta_0} \tanh\left(\frac{\Delta_0}{2T}\right) \quad [13]$$

80 in general.

81 Although in the case of the  $B_{2g}$  order parameter  $P_{xy}$  the Hamiltonian cannot be written as concisely, a similar result is still  
82 obtained:

$$83 \quad \chi_{Q_{B_{2g}}} = \left. \frac{dQ_{B_{2g}}}{d\varepsilon_{B_{2g}}} \right|_{\varepsilon \rightarrow 0} = \frac{15B_{xy}}{T} \quad [14]$$

84 when  $T \gg \Delta_0$ , and

$$\chi_{Q_{B_{2g}}} = \left. \frac{dQ_{B_{2g}}}{d\varepsilon_{B_{2g}}} \right|_{\varepsilon \rightarrow 0} = \frac{30B_{xy}}{\Delta_0} \tanh\left(\frac{\Delta_0}{2T}\right) \quad [15]$$

in general.

Hence both the  $B_{1g}$  and  $B_{2g}$  quadrupole strain susceptibilities can be put in the form:

$$\chi_{Q_{\Gamma_i}} = \left. \frac{dQ_{\Gamma_i}}{d\varepsilon_{\Gamma_i}} \right|_{\varepsilon \rightarrow 0} = \frac{2\langle Q_{\Gamma_i} \rangle_o^2 B_{\Gamma_i}}{\Delta_0} \tanh\left(\frac{\Delta_0}{2T}\right) \quad [16]$$

Assuming no  $B_{1g}$  or  $B_{2g}$  strain is being applied, the  $A_{1g}$  quadrupole-strain susceptibility is:

$$\chi_{Q_{A_{1g}}} = \left. \frac{dQ_{A_{1g}}}{d\varepsilon_{A_{1g}}} \right|_{\varepsilon \rightarrow 0} = \frac{\langle Q_{A_{1g}} \rangle_o^2 (B_0^2)_1 \operatorname{sech}^2\left(\frac{\Delta_0}{2T}\right)}{T} \quad [17]$$

Where  $\langle Q_{A_{1g}} \rangle_o = 3$

Adding in mean-field interactions of the form  $H_{QQ} = K_{\Gamma_i} \langle Q_{\Gamma_i} \rangle Q_{\Gamma_i}$  will renormalize the quadrupole-strain susceptibilities to be in the form:

$$\chi_{Q_{\Gamma_i}} = \left. \frac{dQ_{\Gamma_i}}{d\varepsilon_{\Gamma_i}} \right|_{\varepsilon \rightarrow 0} = \frac{2B_{\Gamma_i} \langle Q_{\Gamma_i} \rangle_o^2 \tanh\left(\frac{\Delta_0}{2T}\right)}{\Delta_0 - 2K_{\Gamma_i} \langle Q_{\Gamma_i} \rangle_o^2 \tanh\left(\frac{\Delta_0}{2T}\right)} \quad [18]$$

For  $T \gg \Delta/2$  this becomes the familiar expression:

$$\chi_{Q_{\Gamma_i}} = \frac{B_{\Gamma_i} \langle Q_{\Gamma_i} \rangle_o^2}{T - \langle Q_{\Gamma_i} \rangle_o^2 K_{\Gamma_i}} \quad [19]$$

For  $A_{1g}$  this renormalizes it to become:

$$\chi_{A_{1g}} = \frac{B_0^2 \langle Q_2^0 \rangle_o^2 \operatorname{sech}^2\left(\beta\left(\Delta/2 + 3K_2^0 \langle O_2^0 \rangle_{\varepsilon=0}\right)\right)}{T - \langle Q_2^0 \rangle_o^2 K_2^0 \operatorname{sech}^2\left(\beta\left(\Delta/2 + 3K_2^0 \langle O_2^0 \rangle_{\varepsilon=0}\right)\right)} \quad [20]$$

The proposed CEF quasi-quartet states (4) can be substituted in to find the actual values :  $\langle Q_i \rangle_o$ :  $\langle O_2^0 \rangle_o = 3.035$ ,  $\langle O_2^2 \rangle_o = 8.3185$ , and  $\langle P_{xy} \rangle_o = 3.4660$

With these values the elasto-resistivity measurements can be fit to to obtain absolute values for  $K_i$  and the gap  $\Delta$  and relative ratios of  $B_i$ .

## 5. Relation of Elasto-resistivity to Quadrupole-strain Susceptibility

To show how the proportionality between the quadrupole-strain susceptibilities and the elasto-resistivity coefficients is obtained, we follow Friederich and Fert (6) and extend their argument to tetragonal systems, replacing the magnetic field with strain as the source of the quadrupole moment. If we make the following assumptions that: a) the strain is perturbative, hence the quadrupole moments can be treated as impurities but the system has a infinitesimal overall quadrupole moment; b) The scattering is dominated by isotropic (in the ab plane) elastic scattering potentials  $V\delta(r_i)$  at each Yb site  $i$ ; c) We can use the first Born approximation to obtain the scattering rate  $W_{kk'}$ ; and d) The conduction electrons are primarily s-wave and p-wave in character, then we can follow the argument laid out in Ref. (6).

We begin by writing down the scattering interaction between s and p wave conduction electrons and  $4f$  sites originally derived by Kondo:

$$V_{scatt} = \sum_{kk'} \left[ V - \frac{D}{k_f^2} \left( (J \cdot k)(J \cdot k') - \frac{J(J+1)}{3} k \cdot k' \right) \right] a_{k'}^\dagger a_k \quad [21]$$

Where  $D$  is the coefficient of the quadrupolar scattering potential from the  $4f$  electrons, and  $V$  in the sum is the previously mentioned strength of the isotropic scattering potential. When this potential is plugged into Fermi's Golden rule, assuming the quadrupole term is perturbatively small, the anisotropic cross terms lead to a resistivity ratio directly from Ref. (6), Equation 3:

$$\frac{\rho_i^Q}{\rho_0} = \frac{2D}{3V} \left( \langle J_i^2 \rangle - \frac{J(J+1)}{3} \right) \quad [22]$$

Where  $i$  is the direction of the current, and  $\rho_0$  is the resistivity due to the isotropic scattering potential (isotropic only in the ab plane in the case of  $\text{YbRu}_2\text{Ge}_2$ )

121 Thus:

$$122 \quad \frac{\rho_x^Q - \rho_y^Q}{2\rho_0} = \frac{D}{3V} \left( \langle J_x^2 \rangle - \langle J_y^2 \rangle \right) = \frac{D}{3V} \langle O_2^2 \rangle \quad [23]$$

123 Because inelastic scattering should only be dependent on the magnitude of the gap and matrix elements like  $\langle |Q_i| \rangle^2$ , its  $B_{1g}$   
 124 component induced by strain should be close to zero. Similarly the anisotropic part of the Kondo scattering should be close to  
 125 zero, as there is no reason to suggest there are quadrupolar aspects of the coupling of conduction electrons to the magnetic  
 126 aspects of the  $4f$  sites. Thus, taking the appropriate strain derivatives (in this case, with respect to  $\varepsilon_{xx} - \varepsilon_{yy}$ ), we find that  
 127 the elasto-resistivity associated with scattering from the  $4f$  orbital is directly proportional (with a temperature independent  
 128 proportionality coefficient) to the  $B_{1g}$  quadrupole-strain susceptibility.

$$129 \quad \left. \frac{\partial(\rho_{4f}^{xx} - \rho_{4f}^{yy})}{\rho_{4f}^0} \right|_{\varepsilon \rightarrow 0} \approx \frac{D}{3V} \frac{\partial \langle O_2^2 \rangle}{\partial \varepsilon_{B1g}} \propto \chi_{B1g} \quad [24]$$

130 Several scattering processes contribute to the resistivity of  $\text{YbRu}_2\text{Ge}_2$ . Assuming validity of Matthiessen's rule,  $\rho_{\text{YbRu}_2\text{Ge}_2} =$   
 131  $\rho_{\text{imp}} + \rho_{e-ph} + \rho_{e-e} + \rho_{4f}$  where  $\rho_{\text{imp}}$  arises from impurity scattering,  $\rho_{e-ph}$  from electron-phonon interactions,  $\rho_{e-e}$  from  
 132 electron-electron scattering, and  $\rho_{4f}$  is defined above. At least in principle, each of these terms can have an associated  
 133 elasto-resistivity; the expression derived in Eq. 24 above relates only to the  $4f$  part. Contributions to the resistivity and  
 134 elasto-resistivity arising from  $\rho_{\text{imp}}$ ,  $\rho_{e-ph}$  and  $\rho_{e-e}$  can be subtracted by considering a non-magnetic analog that has the same  
 135 crystal structure, the same band structure and a similar impurity concentration.  $\text{YRu}_2\text{Ge}_2$  (note that Y = Yttrium, different  
 136 to Ytterbium Yb) potentially provides such a non-magnetic analog. Such a subtraction would then yield,

$$137 \quad \frac{\partial(\rho_{4f}^{xx} - \rho_{4f}^{yy})}{\rho_{4f}^0} \approx \frac{\partial(\rho_{\text{YbRu}_2\text{Ge}_2}^{xx} - \rho_{\text{YbRu}_2\text{Ge}_2}^{yy})}{\rho_{\text{YbRu}_2\text{Ge}_2}^0 - \rho_{\text{YRu}_2\text{Ge}_2}^0} - \frac{\partial(\rho_{\text{YRu}_2\text{Ge}_2}^{xx} - \rho_{\text{YRu}_2\text{Ge}_2}^{yy})}{\rho_{\text{YbRu}_2\text{Ge}_2}^0 - \rho_{\text{YRu}_2\text{Ge}_2}^0} \quad [25]$$

138 where superscripts '0' refer to zero strain conditions.

139 The unstrained resistivity of  $\text{YRu}_2\text{Ge}_2$ ,  $\rho_{\text{YRu}_2\text{Ge}_2}^0$ , is found to be almost an order of magnitude smaller than that of  
 140  $\text{YbRu}_2\text{Ge}_2$  (see Figure 3 in the main paper). Furthermore, normal metals far from any electronic instabilities, typically exhibit  
 141 very small elasto-resistivities. Hence, we can safely make the approximation that:

$$142 \quad \frac{\partial(\rho_{4f}^{xx} - \rho_{4f}^{yy})}{\rho_{4f}^0} \approx \frac{\partial(\rho_{\text{YbRu}_2\text{Ge}_2}^{xx} - \rho_{\text{YbRu}_2\text{Ge}_2}^{yy})}{\rho_{\text{YbRu}_2\text{Ge}_2}^0} \propto \chi_{B1g} \quad [26]$$

143 Hence elasto-resistivity will be a direct measure of the quadrupole-strain susceptibility given these conditions.

## 144 6. Linearity of the $B_{1g}$ elasto-resistivity

145 An effective way to show that the elasto-resistivity is linear in strain while using the AC technique that we describe in the main  
 146 paper is to perform these measurements for a variety of offset bias strains. In Fig. S5 we show data for the  $B_{1g}$  response for  
 147 measurements performed with an AC amplitude corresponding to a peak-to-peak voltage applied to the PZT stack of 40 volts,  
 148 with a simultaneous DC bias voltage of 0V, -250V and + 250V in the temperature range from 6 to 20 K. Over this temperature  
 149 range, these offset voltages correspond to DC strain offsets (relative to 0V) of approximately 0, -0.021%, and 0.029%. As can  
 150 be seen by inspecting the figures, in the temperature range above  $T_Q$ , the data almost perfectly line up, demonstrating the  
 151 absence of any significant non-linear response.

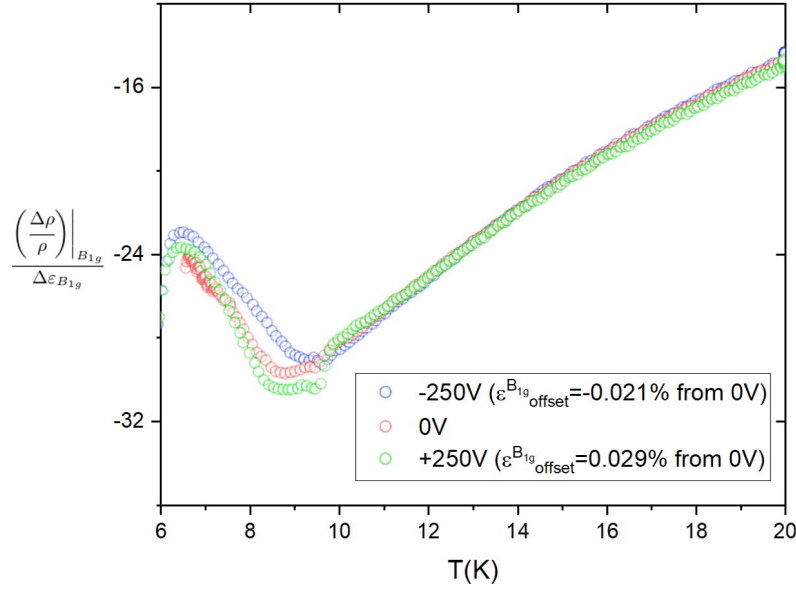

**Fig. S5. Strain dependence of the  $B_{1g}$  elasto-resistivity response** The  $B_{1g}$  quadrupole-strain susceptibility displays little sensitivity to tuning  $B_{1g}$  offset strains above the quadrupolar phase transition indicating this channel is dominated by linear behavior, and hence  $\left(\frac{\Delta\rho}{\rho}\right)_{B_{1g}}/\Delta\varepsilon_{B_{1g}}$  provides a good measure of the linear elasto-resistivity coefficients for this symmetry channel,  $m_{11}\cdot m_{12}$

## 7. Non-linearity of the $A_{1g}$ elasto-resistivity

In contrast to the case of  $B_{1g}$  response, the in-plane  $A_{1g}$  response  $\frac{\rho_{xx} + \rho_{yy}}{\rho_0}$  exhibited a striking non-linearity. Fig. S6 shows the response for measurements performed with an AC amplitude corresponding to a peak-to-peak voltage applied to the PZT stack of 40 volts, with a simultaneous DC bias voltage of 0V, -250V and +250V in the temperature range from 6 to 20 K. Over this temperature range, these offset voltages correspond to DC strain offsets (relative to 0V) of approximately 0, -0.021%, and 0.029%. The sample was oriented on the PZT stack such that the crystal experienced a combination of  $A_{1g}$  and  $B_{1g}$  strains for Fig. S6, and  $A_{1g}$  and  $B_{2g}$  strains for Fig. S7. As can be seen, there is a striking difference between the measurements, indicating the presence of a substantial non-linear  $A_{1g}$  elasto-resistivity in response to  $B_{1g}$  symmetry strains.

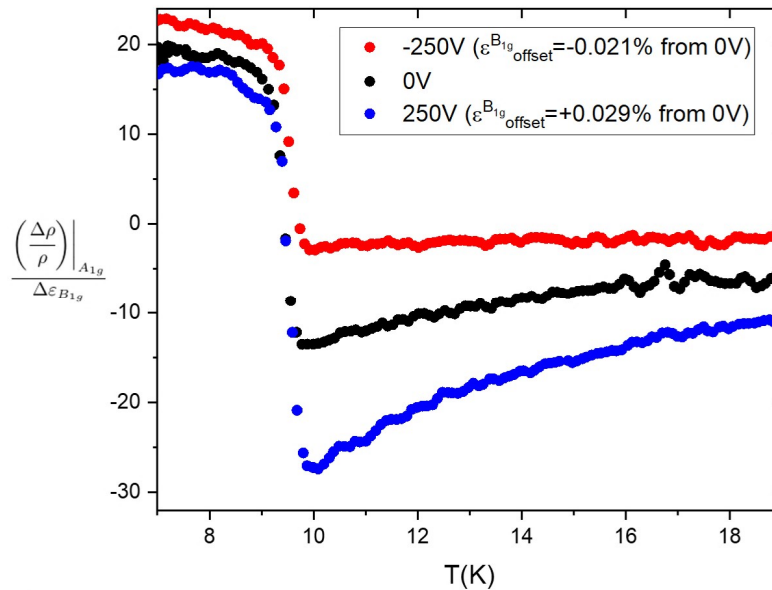

**Fig. S6. Non-linearity of the  $A_{1g}$  response with respect to  $B_{1g}$  strain.** The  $A_{1g}$  quadrupole-strain susceptibility displays striking sensitivity to tuning offset  $B_{1g}$  strains above the quadrupolar phase transition.



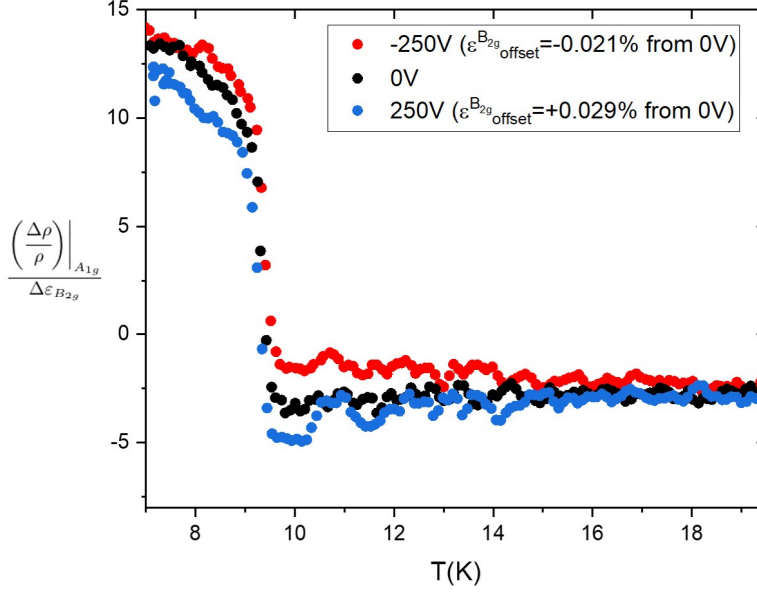

**Fig. S7. Non-linearity of the  $A_{1g}$  response with respect to  $B_{2g}$  strain.** The  $A_{1g}$  quadrupole-strain susceptibility displays small sensitivity to tuning offset  $A_{1g}$  and  $B_{2g}$  strains above the quadrupolar phase transition.

160 Although the  $A_{1g}$  response is not the main subject of this paper, we outline below the origin of this effect, making particular  
 161 reference to how this shows up in an AC measurement.

162 To second order in strain, a crystal that experiences both  $A_{1g}$  and  $B_{1g}$  symmetry strains can experience an  $A_{1g}$  elastoresistance  
 163 response given by

$$164 \left(\frac{\Delta\rho}{\rho}\right)_{A_{1g}} = m_{A_{1g}}^{A_{1g}}\varepsilon_{A_{1g}} + m_{A_{1g}}^{A_{1g},A_{1g}}[\varepsilon_{A_{1g}}]^2 + m_{A_{1g}}^{B_{1g},B_{1g}}[\varepsilon_{B_{1g}}]^2 \quad [27]$$

165 Where we are following the notation used in Ref. [(7)]. The linear term proportional to  $\varepsilon_{A_{1g}}$  is allowed by symmetry as well  
 166 as quadratic terms proportional to  $\varepsilon_{B_{1g}}^2$ .

167 Since the AC Elastoresistivity method used for these measurements locks in to the response at the frequency  $\omega$  at which the  
 168 strain is applied, it is useful to write the strains out as a combination of DC offset strains (arising for example from thermal  
 169 expansion mismatches and glue strains, as well as intentional bias strains as mentioned previously) and AC applied strains:

$$170 \varepsilon_i^{tot} = \varepsilon_i^{DC} + \varepsilon_i^{AC} \cos \omega t \quad [28]$$

171 Where  $i$  represents the symmetry channel and the amplitude of the AC term depends on the voltage waveform applied to  
 172 the piezo. Substituting into Eq. 27 and focusing on the amplitude of the signal that will be locked into at frequency  $\omega$ :

$$173 \left(\frac{\Delta\rho}{\rho}\right)_{A_{1g}}^{AC} = m_{A_{1g}}^{A_{1g}}\varepsilon_{A_{1g}}^{AC} + 2m_{A_{1g}}^{A_{1g},A_{1g}}\varepsilon_{A_{1g}}^{DC}\varepsilon_{A_{1g}}^{AC} + 2m_{A_{1g}}^{B_{1g},B_{1g}}\varepsilon_{B_{1g}}^{DC}\varepsilon_{B_{1g}}^{AC} \quad [29]$$

174 Thus we can expect both a linear and non-linear contribution to the signal, with the strength of the non-linear part  
 175 determined by both the amount of offset strain and the quadratic coefficient of that channel.

176 A similar difference in non-linear elastoresistivity coefficients was recently observed for the underdoped Fe-based super-  
 177 conductor,  $\text{Ba}(\text{Fe}_{0.975}\text{Co}_{0.025})_2\text{As}_2$  (7). In that material, the nematic transition occurs in the  $B_{2g}$  symmetry channel and the  
 178 quantity  $m_{A_{1g}}^{B_{2g},B_{2g}}$  exhibits a divergence. In the present case,  $\text{YbRu}_2\text{Ge}_2$  undergoes a nematic transition in the  $B_{1g}$  symmetry  
 179 channel, and the quantity  $m_{A_{1g}}^{B_{1g},B_{1g}}$  appears to grow very large. Both results highlight the role played by nematic (quadrupole)  
 180 fluctuations in affecting the isotropic properties of materials. In the case of  $\text{YbRu}_2\text{Ge}_2$ , the observation of a large  $m_{A_{1g}}^{B_{1g},B_{1g}}$   
 181 adds further evidence to our conclusion that the quadrupole-strain susceptibility is large in the  $B_{1g}$  channel but small in the  
 182  $B_{2g}$  channel.

## 183 8. Focused Ion Beam parameters

184 The instrument used to etch the samples was an FEI Helios NanoLab 600i DualBeam FIB/SEM, containing both a focused Ga+  
 185 ion beam ("Tomahawk") and a high resolution field emission scanning electron ("Elstar") column. Combined with advances in  
 186 patterning, scripting, and a suite of accessories, these features make milling, imaging, analysis, and sample preparation down to  
 187 the nanoscale possible.

188 A 65 nA ion current was used to etch through the samples. Gallium implantation is expected to affect a depth of less than  
189 100 nm from the surface roughly, which is inconsequential for the bulk resistivity measurements that were performed.

## 190 9. Crystal Growth and Measurement Details

191 Single crystals of  $\text{YbRu}_2\text{Ge}_2$  were grown using an unseeded flux method, with Indium being the flux and the other precursors  
192 added in stoichiometrically. The flux ratio was varied from 96-98%, with 97.5% found to produce both the largest size individual  
193 crystals and also the greatest yield. To help ensure inclusion of the high-melting point Ru into the melt, the elemental Ru and  
194 Ge precursors were arc-melted in a mono-arc furnace. The elements were then combined into an alumina crucible, which was  
195 sealed inside a Ta crucible to prevent oxidation and to contain the flux. The crucibles were heated to a max temperature of  
196 1450K for 6-12 hours, and then cooled to 1200K at approximately 4K/hour. The alumina crucibles were then sealed in quartz  
197 and spun in a centrifuge at 400K to remove the Indium flux from the crystals. The resulting crystals were etched in HCl acid  
198 for several months until they were easily cleaveable.

199 For transport and elastoresistivity measurements, current and voltage contacts were made to the sample by connecting gold  
200 wires to the sample using Epotech H-20E silver paste. Typical bar dimensions for samples in elastoresistivity measurements  
201 were 200-400 $\mu\text{m}$  in length, by 70-120 $\mu\text{m}$  in width. Samples were glued using Angstrom Bond to Si substrates, which were then  
202 bonded to the center of a side of a Piezomechanick 5x5x9 mm PZT piezoelectric stack (Piezomechanik PSt150/5x5/7 cryo 1)  
203 in the appropriate orientation using Devcon 5-Minute Epoxy. Uncertainty in alignment with respect to the crystal axes was  
204 estimated to be less than 2 degrees. The PZT stack was mounted on a thermally anchored probe in a helium flow cryostat.

205 AC Elastoresistivity measurements were applied using a 1.6Hz 50V rms sinusoidal excitation to the PZT while simultaneously  
206 driving a 5 mA rms current through the sample at 107 Hz, sourced by a Keithley 6221 DC and AC current source.

207 The signal was first measured by a SRS830 lock-in amplifier (LIA) with a time constant < 30ms referenced to 107 Hz,  
208 and the output of that LIA is measured by a second LIA with a time constant of > 3s referenced at 1.6Hz to detect the  
209 elastoresistivity signal. Care was taken to ensure the phase of the output signal was properly accounted for. Strain transmission  
210 was measured from the piezo surface to the top surface of the Si where the samples were glued, and was determined to be  
211 roughly 50% and essentially temperature independent from 4K to 100K. This was taken into account in determining the  
212 magnitude of the elastoresistivity coefficients.

## 213 References

- 214 1. Morin P, Schmitt D (1990) Quadrupolar interactions and magneto-elastic effects in rare earth intermetallic compounds  
215 **Handbook of Ferromagnetic Materials, Vol. 5 1990, 1-132**
- 216 2. Jeevan HS, Adroja DT, Hillier AD Hossain Z, Ritter C, Geibel C (2011) Muon spin relaxation and neutron diffraction  
217 investigations of quadrupolar and magnetically ordered states of  $\text{YbRu}_2\text{Ge}_2$  **Phys Rev B 84, 184405**
- 218 3. Jeevan HS, Geibel C, Hossain Z (2006) Quasiquartet crystal-electric-field ground state with possible quadrupolar ordering  
219 in the tetragonal compound  $\text{YbRu}_2\text{Ge}_2$  **Phys Rev B 73 020407(R)**
- 220 4. Jeevan HS (2010) Crystal Growth and Investigation of  $\text{CeCu}_2\text{Si}_2$  and  $\text{YbRu}_2\text{Ge}_2$ : Competition/Co-existence of Supercon-  
221 ducting, Dipolar and Quadrupolar order **core.ac.uk**
- 222 5. Blomberg EC et al (2012) Effect of tensile stress on the in-plane resistivity anisotropy in  $\text{BaFe}_2\text{As}_2$  **Phys. Rev. B 85,**  
223 **144509**
- 224 6. Friederich A and Fert A (1974) Electron Scattering by the Electronic Quadrupole Moment of Rare-Earth Impurities **Phys.**  
225 **Rev. Lett. 33 1214**
- 226 7. Palmstrom JC et al (2017) Critical divergence of the symmetric ( $A_{1g}$ ) nonlinear elastoresistance near the nematic transition  
227 in an iron-based superconductor **Phys Rev B 96.205133**
